# Supplementary material
Source: MDPI journal article supplement (https://www.mdpi.com/2227-9717/12/1/219)
Supplement: s1 [file s1]

# EFFECTS OF THE PMMA MOLECULAR WEIGHT ON THE THERMAL AND THERMO-OXIDATIVE DECOMPOSITION AS THE FIRST CHEMICAL STAGE OF FLAMING IGNITION

A. Galgano\*, C. Di Blasi

Dipartimento di Ingegneria Chimica, dei Materiali e della Produzione Industriale, Università degli Studi di Napoli "Federico II", P.le V. Tecchio, 80125 Napoli, Italy.

\* Corresponding author Tel:39-081-7682232; e-mail: agalgano@unina.it

## Mathematical model

The conservation equations, the boundary conditions and the relations for the physical properties are listed in Table S1, S2 and S3. The spark is described as a finite-difference cell at the position  $x_i$  that, over an assigned period  $f$ , is instantaneously brought at the temperature  $T_{\text{spark}}$  for a time duration  $d$ . However the spark temperature only intervenes for the computation of the MMA combustion rate (eqn.49), while the temperature is still computed by means of eqn. 20a.

- Transport equations - Solid phase ( $-L_s, 0$ )

$$\frac{d\rho_i}{dt} = -A_{di} \exp\left(-\frac{E_{di}}{RT_s}\right) \rho_i^{n_i}, \rho_i(t=0) = \nu_{i0} \rho_s \text{ for } i = 1, 2, 3, 4 \quad (1a-4a, 1b-4b)$$

$$\omega_d = \sum_1^4 \frac{d\rho_i}{dt} \quad (5)$$

$$\rho_s \frac{dL_s}{dt} = \int_{-L_s}^0 \omega_d dx, L_s(t=0) = L_{s0}, V = \frac{1}{\rho_s} \int_{-L_s}^0 \omega_d dx \quad (6a-6c)$$

$$\frac{d(u\rho_g)}{dx} = \omega_d \quad (7)$$

$$\rho_g = \frac{p_0 M_{MMA}}{RT_s} \quad (8)$$

$$\rho_s c_s \frac{\partial T_s}{\partial t} = -u c_{MMA} \rho_g \frac{\partial T_s}{\partial x} + \frac{\partial}{\partial x} \left( k_s \frac{\partial T_s}{\partial x} \right) + \Delta h_d \omega_d + \frac{\partial}{\partial x} I_s, T_s(t=0) = T_0 \quad (9a, 9b)$$

$$\frac{d}{dx} I_s = I_s \Big|_{x=0} \beta_s e^{\beta_s x_s} \quad (10)$$

- Transport equations - Gaseous phase ( $0, L_g$ )

$$\omega_c = -A_c T_g^{-2} \exp\left(-\frac{E_c}{RT_g}\right) Y_{MMA} Y_{O_2} \quad (11)$$

$$\frac{\partial \rho_g}{\partial t} = -\frac{\partial u \rho_g}{\partial x}, \rho_g(t=0) = \rho_{g0} \quad (12a, 12b)$$

$$\rho_g = \frac{p_0 \bar{M}}{RT_g}, \rho_g = \rho_{MMA} + \rho_P + \rho_{O_2} + \rho_{N_2}, \bar{M} = \frac{\sum_i \rho_i M_i}{\rho_g} \quad i = MMA, P, O_2, N_2 \quad (13-15)$$

$$\frac{\partial \rho_g Y_{MMA}}{\partial t} = -\frac{\partial u \rho_g Y_{MMA}}{\partial x} + \frac{\partial}{\partial x} D_{MMA} \rho_g \frac{\partial Y_{MMA}}{\partial x} - \omega_c, Y_{MMA}(t=0) = Y_{MMA0} \quad (16a, 16b)$$

$$\frac{\partial \rho_g Y_{O_2}}{\partial t} = -\frac{\partial u \rho_g Y_{O_2}}{\partial x} + \frac{\partial}{\partial x} D_{O_2} \rho_g \frac{\partial Y_{O_2}}{\partial x} - \nu_c \omega_c, Y_{O_2}(t=0) = Y_{O_20} \quad (17a, 17b)$$

$$\frac{\partial \rho_g Y_P}{\partial t} = -\frac{\partial u \rho_g Y_P}{\partial x} + \frac{\partial}{\partial x} D_P \rho_g \frac{\partial Y_P}{\partial x} + (1 + \nu_c) \omega_c, Y_P(t=0) = Y_{P0} \quad (18a-18b)$$

$$Y_{N_2} = 1 - Y_{MMA} - Y_{O_2} - Y_P \quad (19)$$

$$\rho_g c_g \frac{\partial}{\partial t} T_g = -u \rho_g c_g \frac{\partial}{\partial x} T_g + \frac{\partial}{\partial x} k_g \frac{\partial T_g}{\partial x} - \omega_c \Delta h_c + \frac{dI_g}{dx} - \frac{dJ_g}{dx}, T_g(t=0) = T_0 \quad (20a, 20b)$$

$$\frac{dI_g}{dx} = aI_g - \frac{1}{2} a \sigma T_g^4, \quad \frac{dJ_g}{dx} = -aJ_g + \frac{1}{2} a \sigma T_g^4 \quad (21-22)$$

- Boundary conditions

$$u \rho_g \Big|_{x=-L_s} = 0 \quad (23)$$

$$\frac{\partial T_s}{\partial x} \Big|_{x=-L_s} = 0, \quad T_s \Big|_{x=0^-} = T_g \Big|_{x=0^+} \quad (24-25)$$

$$I_s \Big|_{x=0} = I_g \Big|_{x=0} (1 - e_s) \quad (26)$$

$$u \rho_g \Big|_{x=0^+} = u \rho_g \Big|_{x=0^-} \quad (27)$$

$$u \rho_g Y_{MMA} \Big|_{x=0^+} - D_{MMA} \rho_g \frac{\partial Y_{MMA}}{\partial x} \Big|_{x=0^+} = u \rho_g \Big|_{x=0^-}, \quad Y_{MMA} \Big|_{x=L_g} = 0 \quad (28a, 28b)$$

$$u \rho_g Y_{O_2} \Big|_{x=0^+} - D_{O_2} \rho_g \frac{\partial Y_{O_2}}{\partial x} \Big|_{x=0^+} = 0, \quad Y_{O_2} \Big|_{x=L_g} = Y_{O_20} \quad (29a, 29b)$$

$$u \rho_g Y_P \Big|_{x=0^+} - D_P \rho_g \frac{\partial Y_P}{\partial x} \Big|_{x=0^+} = 0, \quad Y_P \Big|_{x=L_g} = 0 \quad (30a, 30b)$$

$$-k_g \frac{\partial T_g}{\partial x} \Big|_{x=0^+} + e_p \sigma T_s^4 \Big|_{x=0^+} = -k_s \frac{\partial T_s}{\partial x} \Big|_{x=0^-}, \quad T_g \Big|_{x=L_g} = T_0 \quad (31a, 31b)$$

$$I_g \Big|_{x=L_g} = Q \quad (32)$$

$$J_g \Big|_{x=0^+} = e_s \sigma T_s^4 \Big|_{x=0^+} + e_s I_g \Big|_{x=0^+} \quad (33)$$

**Table S1.** Model equations for the solid and the gas phase with initial and boundary conditions.

$$c_s = \begin{cases} -1330 + 8.6T_s & \text{if } T_s < T_{trans} \\ 1120 + 2.4T_s & \text{if } T_s \geq T_{trans} \end{cases} \quad [J / kgK] \quad (34)$$

$$k_s = \begin{cases} -0.01 + 4.7 \times 10^{-4} T_s & \text{if } T_s < T_{trans} \\ 0.01 + 4 \times 10^{-4} T_s & \text{if } T_s \geq T_{trans} \end{cases} \quad [W / mK] \quad (35)$$

$$c_g = Y_{MMA} c_{MMA} + Y_{O_2} c_{O_2} + Y_{N_2} c_{N_2} + Y_P c_P \quad (36)$$

$$c_P = 0.25c_{H_2O} + 0.75c_{CO_2} \quad (37)$$

$$c_{MMA} = -206 + 4.03T - 1.786 \times 10^{-3} T^2 + 1.04 \times 10^{-7} T^3 \quad [J / kgK] \quad (38)$$

$$c_{O_2} = 1081 + 0.034T_g - 2.4542 \times 10^7 / T_g^2 \quad [J / kgK] \quad (39)$$

$$c_{N_2} = 972 + 0.15T_g \quad [J / kgK] \quad (40)$$

$$c_{CO_2} = 984 + 0.26T_g - 1.86 \times 10^7 / T_g^2 \quad [J / kgK] \quad (41)$$

$$c_{H_2O} = 1911.6 + 0.035T_g + 3.116 \times 10^{-4} T_g^2 \quad [J / kgK] \quad (42)$$

$$D_i = D_{i0} \left( \frac{T_g}{T_0} \right)^{1.75} \quad i = MMA, O_2, P \quad (43-45)$$

$$a = \beta_g Y_{MMA} \quad (46)$$

$$k_g = 0.33 + 7.63 \times 10^{-3} (T_g - T_0) \quad [W / mK] \quad (47)$$

**Table S2.** Equations for the solid and gas properties.

### Schematization of the electric spark

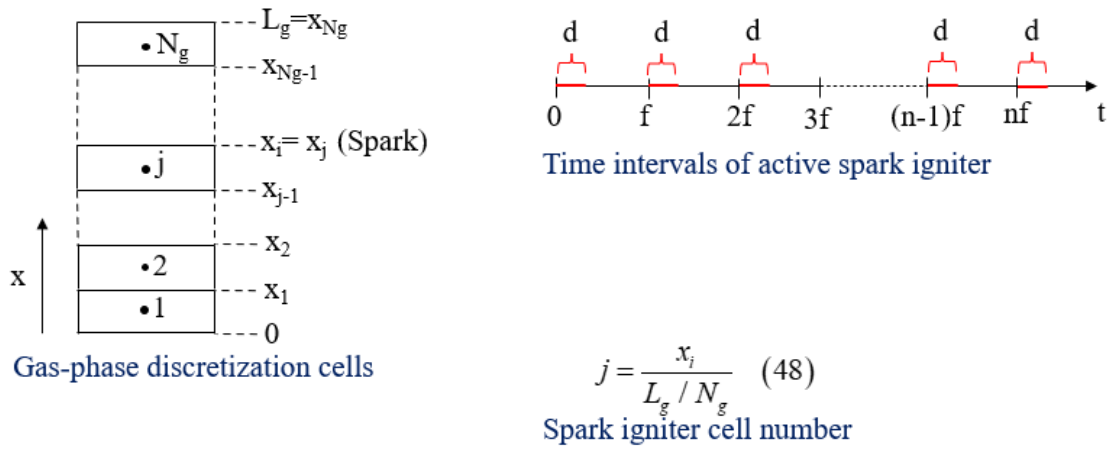

$$\omega_c(j) = -A_c T_{spark}^{-2} \exp\left(-\frac{E_c}{RT_{spark}}\right) Y_{MMA} Y_{O_2} \quad \text{if } f(n-1) \leq t \leq f(n-1) + d \quad (n \in N) \quad (49)$$

Piloted ignition model

**Table S3.** Model equations and schematization of the spark.

## Nomenclature

A Pre-exponential factor of MMA combustion reaction [ $\text{kgK}^2/\text{m}^3\text{s}$ ] or PMMA decomposition reaction [ $\text{s}^{-1}$ ]  
a Radiation absorption [ $\text{m}^{-1}$ ]  
c Specific heat [ $\text{J/kgK}$ ]  
D Molecular diffusivity [ $\text{m}^2/\text{s}$ ]  
d time interval where the spark temperature is equal to  $T_{\text{spark}}$  [s]  
E Activation energy [ $\text{kJ/mol}$ ]  
e Emissivity  
f Period of spark activation [s]  
I Radiative heat flux (towards the polymer surface) [ $\text{W/m}^2$ ]  
J Radiative heat flux (from the polymer surface) [ $\text{W/m}^2$ ]  
k Thermal conductivity [ $\text{W/mK}$ ]  
L Length of the solid- or gas-phase domain [mm]  
M Molecular weight [ $\text{kg/kmol}$ ]  
m Mass flux [ $\text{kg/m}^2\text{s}$ ]  
N Number of discretization cells  
n Reaction order  
p Pressure [Pa]  
Q External irradiance intensity [ $\text{kW/m}^2$ ]  
R Universal gas constant [ $\text{J/kmolK}$ ]  
r Monomer to oxygen mass fraction ratio at the ignition position  
T Temperature [K]  
t Time [s]  
u Gas velocity [m/s]  
V Regression rate [m/s]  
w Width of the gas-phase reaction zone (combustion rate higher than  $0.5\text{kg/m}^3\text{s}$ ) [mm]  
x Spatial coordinate/position [mm]  
 $x_i$  Spark ignitor position [mm]  
Y Mass fraction  
 $\beta$  Radiation absorption coefficient [ $\text{m}^{-1}$ ]  
 $\delta$  Thermal depth [mm]  
 $\Delta h$  Reaction enthalpy [ $\text{J/kg}$ ]  
 $\rho$  Density [ $\text{kg/m}^3$ ]  
 $\nu$  Stoichiometric coefficient of the PMMA decomposition steps  
 $\nu_0$  Stoichiometric coefficient of the MMA combustion reaction  
 $\sigma$  Stefan-Boltzmann constant [ $\text{W/m}^2\text{K}^4$ ]  
 $\omega$  Reaction rate [ $\text{kg/m}^3\text{s}$ ]

## Subscripts

0 Initial or reference  
1,2,3,4 Steps of the decomposition process  
c Combustion  
CO<sub>2</sub> Carbon dioxide  
d Decomposition  
g Gas  
H<sub>2</sub>O Water  
ig Ignition  
max Maximum  
MMA Methyl methacrylate (monomer)  
N<sub>2</sub> Nitrogen

O<sub>2</sub> Oxygen  
P Combustion products  
s Solid/surface  
spark Spark ignitor  
trans Glass transition
